# Supplementary material for: Human Fcγ-receptor IIb modulates pathogen-specific versus self-reactive antibody responses in lyme arthritis
Source: eLife. 2020 Jul 2;9:e55319. doi: 10.7554/eLife.55319 (PMC7438111; doi:10.7554/eLife.55319)
Supplement: Source data 1. [file elife-55319-data1.xlsx]

## Sheet: Figure 1B
days after B.b infection	hum 232 I NSG w/o B.b. left									hum 232 I NSG w/o B.b. right											days after B.b infection		hum 232I NSG left										hum 232I NSG right
0	2.9	2.7	2.5	2.7	2.9	2.6	2.7	2.5		0	2.9	2.7	2.4	2.6	2.7	2.6	2.5	2.4			0	2.4	2.4	2.45	2.4	2.5	2.5			0	2.45	2.5	2.4	2.9	2.5	2.5	2.6
4	2.9	2.7	2.5	2.7	2.8	2.6	2.7	2.5		4	3	2.7	2.4	2.7	2.7	2.6	2.5	2.4			4	2.4	2.4	2.45	2.4	2.4	2.5			4	2.6	2.65	2.6	3.15	2.5	2.5	2.6
7	2.9	2.7	2.4	2.7	2.7	2.6	2.7	2.5		7	2.9	2.8	2.4	2.7	2.7	2.5	2.5	2.4			7	2.4	2.3	2.4	2.4	2.4	2.55			7	2.9	2.9	3.25	3.55	2.75	2.85	2.7
11	2.8	2.7	2.4	2.7	2.7	2.6	2.7	2.5		11	2.9	2.7	2.4	2.7	2.8	2.5	2.5	2.4			11	2.4	2.4	2.45	2.25	2.4	2.55			11	3	3.2	2.9	3.8	2.9	2.9	2.8
14	2.7	2.7	2.5	2.6	2.7	2.6	2.7	2.6		14	2.8	2.7	2.5	2.7	2.7	2.5	2.5	2.5			14	2.45	2.25	2.45	2.6	2.4	2.55			14	3.15	2.9	2.8	3.95	3	3.5	3
18	2.8	2.7	2.4	2.7	2.7	2.7	2.7	2.6		18	2.7	2.7	2.5	2.7	2.8	2.5	2.5	2.6			18	2.6	2.4	2.3	2.6	2.5	2.6			18	3.3	3.3	2.9	3.8	3.1	3.7	3.4
21	2.7	2.7	2.4	2.5	2.7	2.6	2.7	2.6		21	2.8	2.7	2.5	2.6	2.8	2.6	2.5	2.5			21	2.4	2.4	2.5	2.6	2.6	2.6			21	3.7	3.8	3.45	4.3	3.3	4	3.65
25	2.8	2.7	2.4	2.5	2.8	2.6	2.7	2.5		25	2.7	2.7	2.5	2.5	2.8	2.6	2.5	2.5			25	2.5	2.4	2.55	2.9	2.6	2.6			25	4.05	3.8	3.6	4.65	3.5	3.9	3.6
28	2.8	2.7	2.4	2.4	2.7	2.6	2.7	2.6		28	2.7	2.7	2.5	2.5	2.7	2.6	2.5	2.5			28	2.5	2.45	2.7	2.65	2.7	2.9			28	4.1	4	4	4.45	3.7	3.85	3.75
32	2.7	2.7	2.4	2.4	2.7	2.6	2.6	2.6		32	2.7	2.7	2.5	2.5	2.7	2.6	2.4	2.5			32	2.7	2.65	2.9	2.95	2.75	3.1			32	4.05	3.9	3.7	4.3	3.85	4	3.85
35	2.7	2.7	2.4	2.4	2.7	2.6	2.6	2.5		35	2.7	2.7	2.5	2.5	2.7	2.6	2.4	2.5			35	2.65	3	3.2	3.5	2.9	3.2			35	3.65	3.9	3.85	3.75	3.9	4	3.9
days after B.b infection	NSG left							days after B.b infection		NSG right
0	2.4	2.5	2.45	2.5	2.4	2.4			0	2.4	2.55	2.5	2.55	2.6	2.6
4	2.5	2.65	2.5	2.5	2.4	2.4			4	3	3.05	3.25	3.15	3.1	3.45
7	2.4	2.3	2.4	2.4	2.5	2.65			7	3.4	3.75	4	3.6	3.4	3.5
11	2.5	2.8	2.5	2.5	2.65	2.75			11	3.7	4.4	4.25	4.5	3.6	3.7
14	2.65	2.9	2.65	2.65	2.75	2.8			14	4.35	4.3	4.35	4.7	3.75	4.1
18	2.6	3.5	3.7	3.6	2.9	3.1			18	4.15	4.3	4.4	4.35	4	4.15
21	2.8	3.7	3.5	3.7	3.1	3.3			21	4.5	4.5	4.3	4.5	4.2	4.25
25	3.5	4.05	4.35	3.9	3.6	4.05			25	4.3	4.6	4.45	4.1	4.2	4.6
28	3.8	4.4	4.45	4.2	3.8	4.4			28	4.5	4.35	4.25	4.3	4.1	4.5
32	4.05	4.3	4.3	4.4	3.85	4.05			32	4.25	4.25	4.2	4.45	4	4.6
35	4.5	4.55	4.8	4.65	4.5	4.2			35	4.5	4.45	4.1	4.5	4.2	4.5

## Sheet: Figure 1C
copies flaB/ml blood
days after infection
3	0	0	0	33.8	22.9	290.8	n.d
7	98.1	162.5	50.5	1.2	0	0	0
10	0	0	3.9	15.1	132.8	0	0
14	145	924.1	514.3	459.3	422.2	0	336.7
21	5.9	n.d	408.9	0	0	0	375.2
28	0	n.d	410.1	10.9	0	39.7	13.4
35	44.9	n.d	0	20.1	101.8	n.d	316.2
		n.d: not done

## Sheet: Figure 1D
copies flaB/10e5 copies nidogen-1
	ear																						heart												right joint												left joint
day7	0	0	0	0	0	0	0	0	0	0	0	0	0	0	0	0	0	0	0	0		day7	0	0	0	0	22.4	0	0	0	0	0		day7	2086.3	33895.5	0	4960.4	14698	6.9	16714.7	14094.4	7305.8	157.7		day7	0	0	20.2
day14	70.4	271.1	8.1	0	45.8	0	0	0	398.1	182	0	0	72.9	115.4	0	0	2136.1					day14	1131.2	1678.3	2314.2	3269.2	1155.9	342.9	501.6	1795.4	1115.2	2632.9		day14	43410.5	2036.8	4386	2102.4	1644.3	3025.9	2886.4	3949.2	6555.9	3231		day14	0	16407.7	7953.8
day 35	22838.5	8127.8	21202.1	13058.3	12347.3																	day 35	649.9	384.3	2063.2	1225.9	681.3							day 35	5244.3	3909.6	4568.7	3889	3698.4							day 35	9065.1	5978.9	5183.1
[truncated: 7 more columns]

## Sheet: Figure 2A
	CD19+ (% of hCD45%)
PBL	49.4	19.1	81.1	91.3
spleen	54.2	44.8	91.7	82.1
left joint	20.1	6	52.2	65.9
right joint	23.5	6	55	84.7

## Sheet: Figure 2C
	CD69+ (% of hCD19%)
PBL	1.7	2.2	0.3	0.8
spleen	3.6	9.9	3.9	1.4
left joint	27.5	59.1	26.2	16.1
right joint	23.7	46.7	25.9	9.6

## Sheet: Figure 2D
	CD33+ (% of hCD45%)
PBL	3.6	4.9	1.5	2.1
spleen	1.3	3.2	0.8	0.7
left joint	8.6	51.3	14	26.6
right joint	16	50.7	16.3	8

## Sheet: Figure 2F
	CD69+ (% of hCD33%)
PBL	54.5	53.5	63.9	38.8
spleen	56.7	76.9	78.6	85.8
left joint	75	83.8	78.9	83
right joint	45.6	74.3	77.2	72.1

## Sheet: Figure 2G
	CD4+ (% of CD3%)
PBL	78.6	84.6	52.8	71.2
spleen	74.1	85.3	59.3	61
left joint	87.9	87.2	87.9	72.1
right joint	82.2	84.5	82.6	77.3

## Sheet: Figure 2I
	CD69+ (% of CD4%)
PBL	5.4	2.9	2.8	11.6
spleen	18.7	17.8	25.9	25.5
left joint	92.5	88.1	91.2	59.5
right joint	78.8	86.4	87.4	68.2

## Sheet: Figure 2J
	CD8+ (% of CD3%)
PBL	21.1	15.4	46.6	28.6
spleen	25.7	14.3	40.4	38.6
left joint	12.1	12.3	12.1	27.9
right joint	17.8	14.7	17.4	21.5

[truncated: 26 more sheets: Figure 2L, Figure 3B, Figure 3C, Figure 3D, Figure 3E, Figure 3F, Figure 3G, Figure 4B, Figure 4C, Figure 4D, Figure 4E, Figure 4F, Figure 4G, Figure 4H, Figure 5A, Figure 5B, Figure 5C, Figure 5D, Figure 6A, Figur 6B …]
