# Supplementary material for: Human Fcγ-receptor IIb modulates pathogen-specific versus self-reactive antibody responses in lyme arthritis
Source: eLife journal article supplement (doi:10.7554/elife.55319), 2020-07-02

Figure 3-figure supplement 1

A

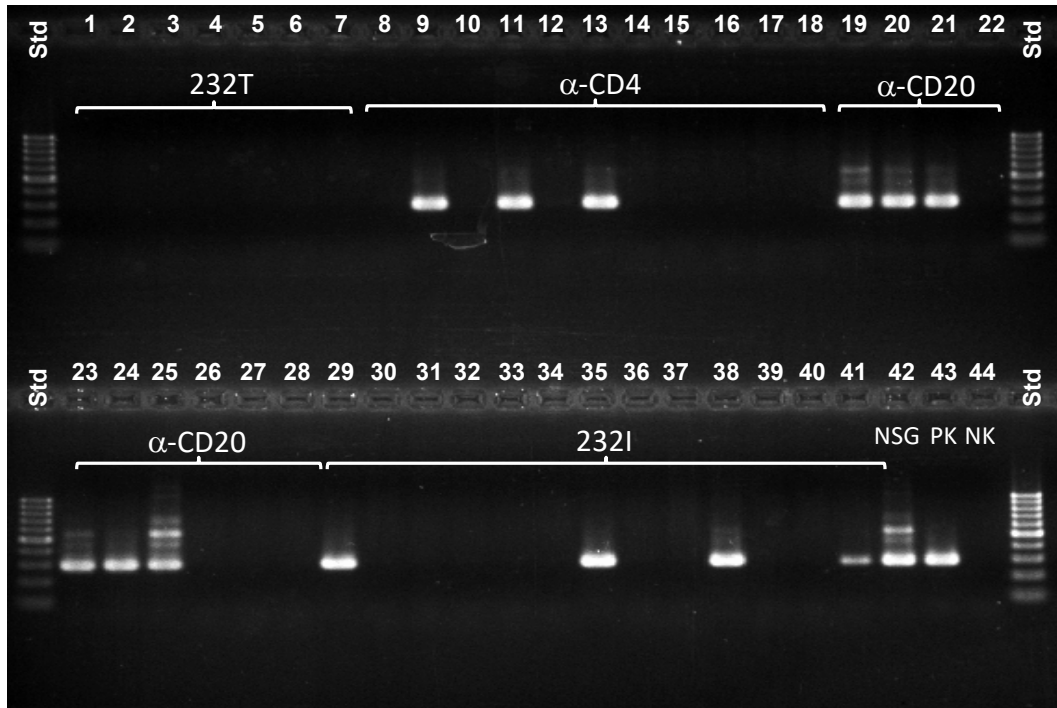

B

| FcγRIIb genotype | 232I       | 232I       | 232I       | 232T     |
|------------------|------------|------------|------------|----------|
| treatment        | PBS        | anti-CD4   | anti-CD20  | PBS      |
| FlaB positive    | 4/13 (31%) | 3/10 (30%) | 6/10 (60%) | 0/7 (0%) |

C

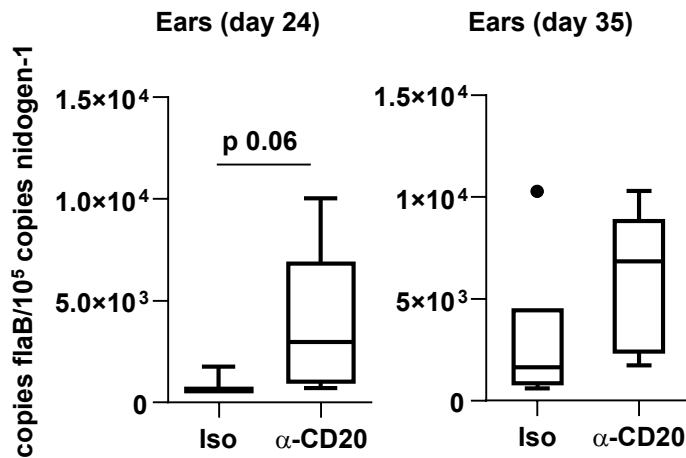

D

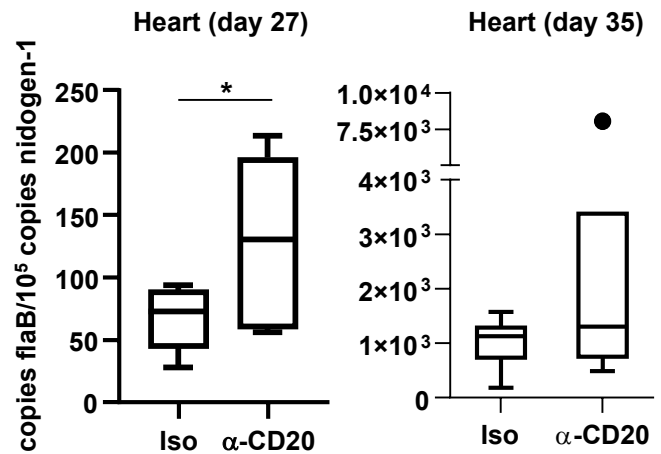

Supplement: supp [file elife-55319-supp-v1.zip]
