# Supplementary figures and images for: Human Fcγ-receptor IIb modulates pathogen-specific versus self-reactive antibody responses in lyme arthritis
Source: eLife journal article supplement (doi:10.7554/elife.55319), 2020-07-02

Figure 2-figure supplement 2

A

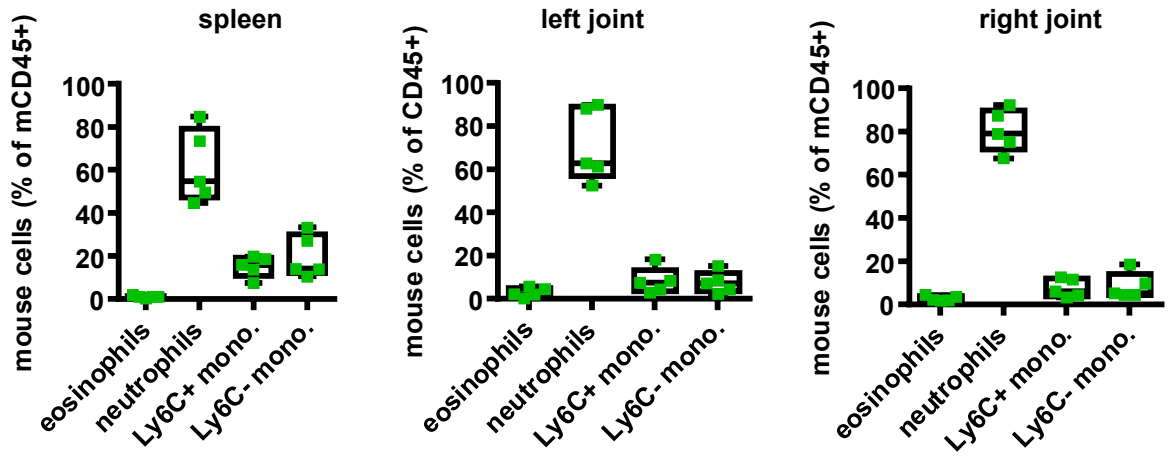

B

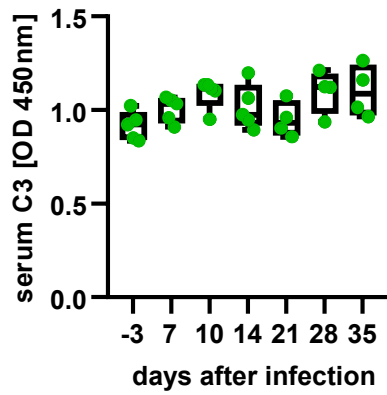

Supplement: supp [file elife-55319-supp-v1.zip]

Figure 2-figure supplement 1

A

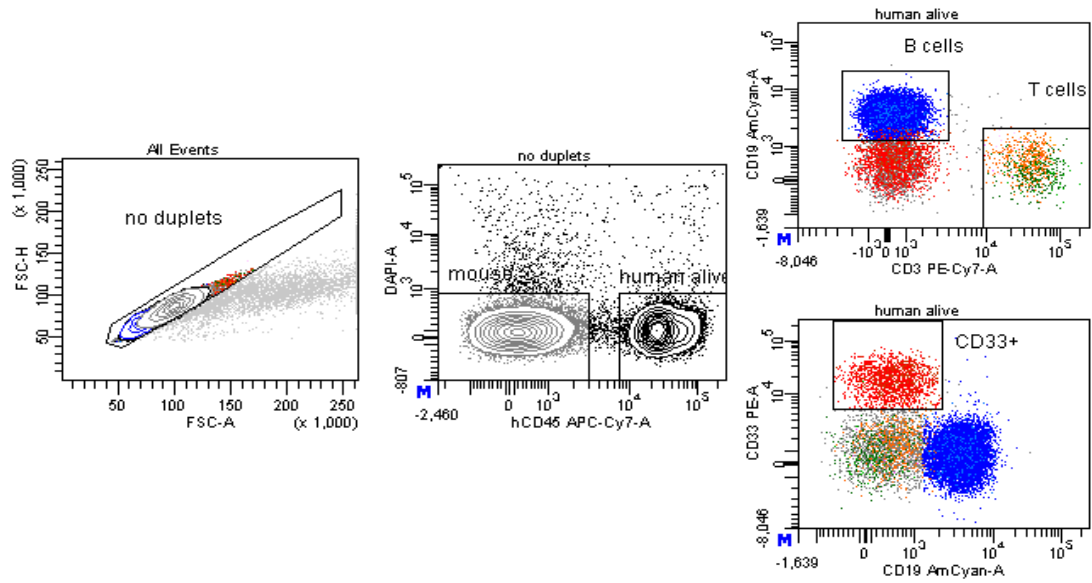

B

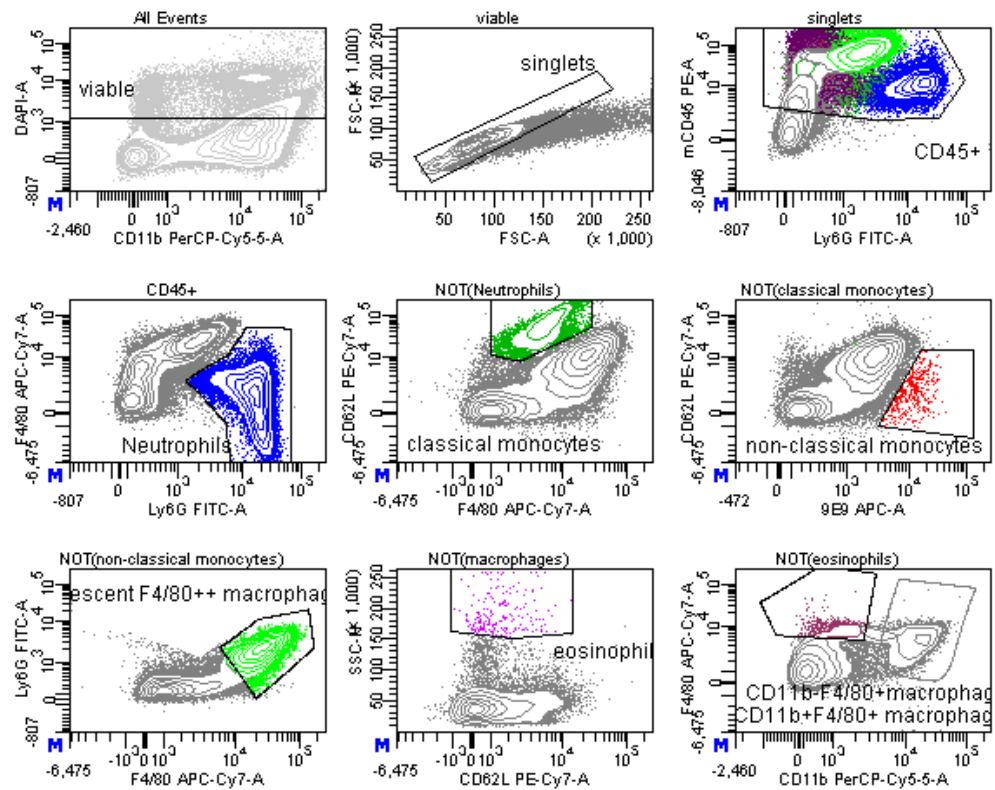

Supplement: supp [file elife-55319-supp-v1.zip]

Figure 3-figure supplement 2

A

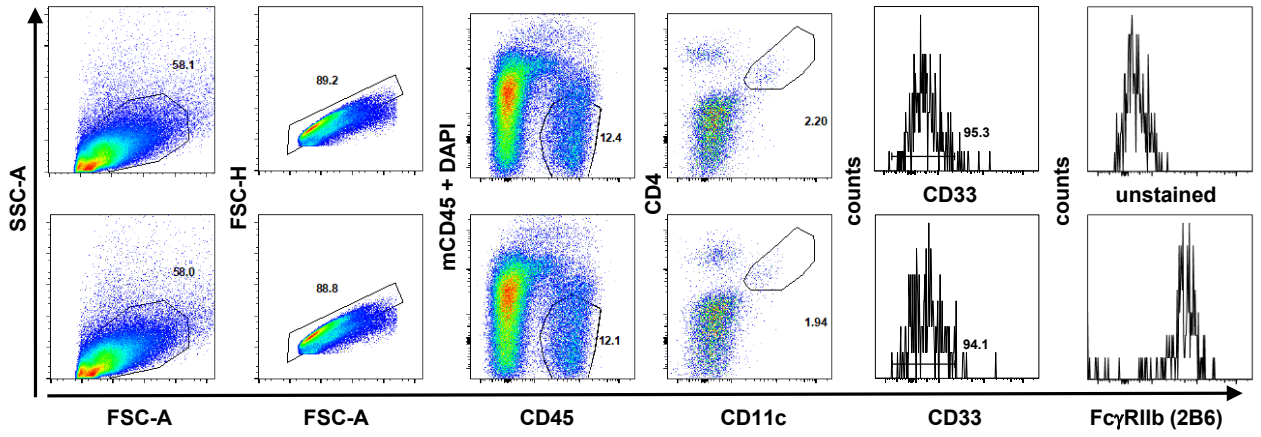

B

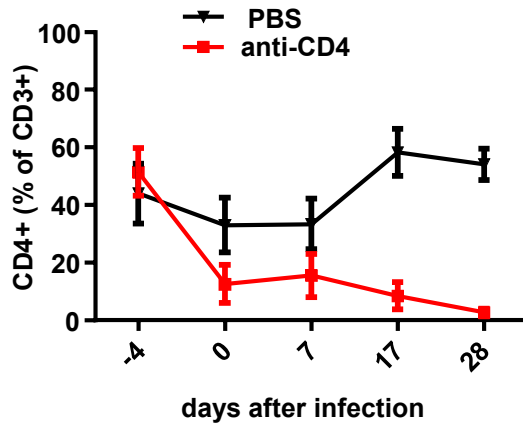

C

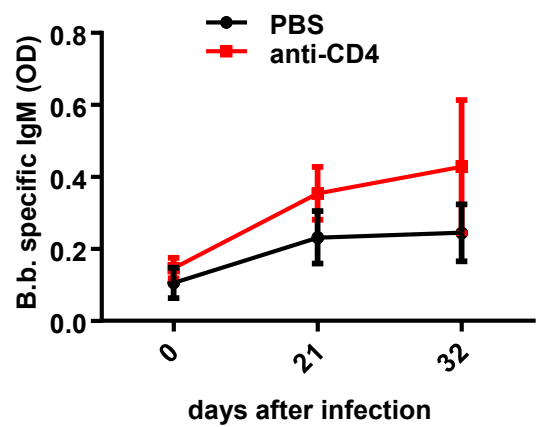

Supplement: supp [file elife-55319-supp-v1.zip]
